# Supplementary material
Source: PubMed Central journal article supplement (PMC5860012)
Supplement: kwx209whitakerwebmaterialfinal.pdf [file kwx209whitakerwebmaterialfinal.pdf]

Web Table 1: Spearman Correlations of Sedentary Tasks, the CARDIA Study (2010-2011), N=3211

|                        |              | <b>Sedentary Tasks</b> |              |              |              |              |  |
|------------------------|--------------|------------------------|--------------|--------------|--------------|--------------|--|
| <b>Sedentary Tasks</b> | Total        | Television             | Computer     | Paperwork    | Reading      | Phone        |  |
| Television             | <b>0.633</b> |                        |              |              |              |              |  |
| Computer               | <b>0.467</b> | <b>0.068</b>           |              |              |              |              |  |
| Paperwork              | <b>0.456</b> | <b>0.078</b>           | <b>0.395</b> |              |              |              |  |
| Reading                | <b>0.465</b> | <b>0.130</b>           | <b>0.121</b> | <b>0.240</b> |              |              |  |
| Phone                  | <b>0.527</b> | <b>0.217</b>           | <b>0.187</b> | <b>0.307</b> | <b>0.268</b> |              |  |
| Car                    | <b>0.458</b> | <b>0.117</b>           | <b>0.123</b> | <b>0.200</b> | <b>0.123</b> | <b>0.276</b> |  |

Bolded values are statistically significant ( $P < 0.05$ ).

Web Table 2: Single-Variable, Partition, and Isotemporal Substitution Models per 2-Hour/Day Increase in Six Sedentary Tasks and Waist Circumference, the CARDIA Study (2010-2011)

| Analysis Method          | Television  |                   | Computer     |                     | Paperwork    |                     | Reading      |                     | Phone        |                     | Car          |                     |
|--------------------------|-------------|-------------------|--------------|---------------------|--------------|---------------------|--------------|---------------------|--------------|---------------------|--------------|---------------------|
|                          | $\beta$     | 95% CI            | $\beta$      | 95% CI              | $\beta$      | 95% CI              | $\beta$      | 95% CI              | $\beta$      | 95% CI              | $\beta$      | 95% CI              |
| Single <sup>b</sup>      | <b>0.05</b> | <b>0.03, 0.08</b> | <b>0.02</b>  | <b>0.00, 0.05</b>   | 0.02         | -0.02, 0.05         | 0.01         | -0.01, 0.04         | 0.01         | -0.02, 0.04         | 0.01         | -0.02, 0.03         |
| Partition <sup>c</sup>   | <b>0.05</b> | <b>0.03, 0.07</b> | 0.02         | -0.01, 0.04         | 0.00         | -0.04, 0.04         | 0.00         | -0.03, 0.03         | -0.01        | -0.05, 0.02         | -0.00        | -0.03, 0.03         |
| Isotemporal <sup>d</sup> |             |                   |              |                     |              |                     |              |                     |              |                     |              |                     |
| Replace Television       | Omit        |                   | <b>-0.03</b> | <b>-0.07, -0.00</b> | <b>-0.05</b> | <b>-0.09, -0.01</b> | <b>-0.05</b> | <b>-0.09, -0.01</b> | <b>-0.06</b> | <b>-0.11, -0.02</b> | <b>-0.05</b> | <b>-0.09, -0.02</b> |
| Replace Computer         | <b>0.03</b> | <b>0.00, 0.07</b> | Omit         |                     | -0.02        | -0.07, 0.03         | -0.02        | -0.05, 0.02         | -0.03        | -0.07, 0.01         | -0.02        | -0.06, 0.02         |
| Replace Paperwork        | <b>0.05</b> | <b>0.01, 0.09</b> | 0.02         | -0.03, 0.07         | Omit         |                     | 0.00         | -0.05, 0.05         | -0.01        | -0.07, 0.04         | -0.00        | -0.05, 0.04         |
| Replace Reading          | <b>0.05</b> | <b>0.01, 0.09</b> | -0.02        | -0.02, 0.05         | -0.00        | -0.05, 0.05         | Omit         |                     | -0.01        | -0.06, 0.04         | -0.00        | -0.04, 0.04         |
| Replace Phone            | <b>0.06</b> | <b>0.02, 0.11</b> | 0.03         | -0.01, 0.07         | 0.01         | -0.04, 0.07         | 0.01         | -0.04, 0.06         | Omit         |                     | -0.02        | -0.08, 0.04         |
| Replace Car              | <b>0.05</b> | <b>0.02, 0.09</b> | 0.02         | -0.02, 0.06         | 0.00         | -0.04, 0.05         | 0.00         | -0.04, 0.04         | 0.02         | -0.04, 0.08         | Omit         |                     |

Data are standardized  $\beta$ -coefficients (95% CI), N=3211. Models adjusted for center, age, sex, race, education, unemployment, health insurance, smoking, alcohol consumption, physical activity, fast food and sugar sweetened beverage consumption, depressive symptoms and body mass index. Bolded values are statistically significant ( $P < 0.05$ ).

Web Table 3: Single-Variable, Partition, and Isotemporal Substitution Models per 2-Hour/Day Increase in Six Sedentary Tasks and Average Blood Pressure, the CARDIA Study (2010-2011)

| Analysis Method          | Television  |                   | Computer     |                     | Paperwork    |                     | Reading      |                     | Phone        |                     | Car          |                     |
|--------------------------|-------------|-------------------|--------------|---------------------|--------------|---------------------|--------------|---------------------|--------------|---------------------|--------------|---------------------|
|                          | $\beta$     | 95% CI            | $\beta$      | 95% CI              | $\beta$      | 95% CI              | $\beta$      | 95% CI              | $\beta$      | 95% CI              | $\beta$      | 95% CI              |
| Single <sup>b</sup>      | <b>0.05</b> | <b>0.00, 0.10</b> | <b>-0.07</b> | <b>-0.13, -0.02</b> | 0.03         | -0.05, 0.12         | 0.03         | -0.04, 0.09         | 0.03         | -0.04, 0.11         | 0.01         | -0.05, 0.07         |
| Partition <sup>c</sup>   | <b>0.05</b> | <b>0.03, 0.07</b> | 0.02         | -0.01, 0.04         | 0.00         | -0.04, 0.04         | 0.00         | -0.03, 0.03         | -0.01        | -0.05, 0.02         | -0.00        | -0.03, 0.03         |
| Isotemporal <sup>d</sup> |             |                   |              |                     |              |                     |              |                     |              |                     |              |                     |
| Replace Television       | Omit        |                   | <b>-0.12</b> | <b>-0.20, -0.05</b> | <b>-0.02</b> | <b>-0.11, -0.08</b> | <b>-0.02</b> | <b>-0.11, -0.06</b> | <b>-0.02</b> | <b>-0.11, -0.08</b> | <b>-0.04</b> | <b>-0.12, -0.04</b> |
| Replace Computer         | <b>0.12</b> | <b>0.05, 0.20</b> | Omit         |                     | 0.11         | -0.01, 0.22         | <b>0.10</b>  | <b>0.02, 0.19</b>   | <b>0.11</b>  | <b>0.00, 0.21</b>   | 0.08         | -0.00, 0.16         |
| Replace Paperwork        | <b>0.02</b> | <b>0.08, 0.11</b> | -0.11        | -0.22, 0.01         | Omit         |                     | -0.00        | -0.12, 0.11         | 0.00         | -0.12, 0.12         | -0.03        | -0.13, 0.08         |
| Replace Reading          | <b>0.02</b> | <b>0.06, 0.11</b> | <b>-0.10</b> | <b>-0.19, -0.02</b> | 0.00         | -0.11, 0.12         | Omit         |                     | 0.01         | -0.11, 0.12         | -0.02        | -0.11, 0.07         |
| Replace Phone            | <b>0.02</b> | <b>0.08, 0.11</b> | <b>-0.11</b> | <b>-0.21, 0.00</b>  | -0.00        | -0.12, 0.12         | -0.01        | -0.12, 0.11         | Omit         |                     | -0.03        | -0.14, 0.08         |
| Replace Car              | <b>0.04</b> | <b>0.04, 0.12</b> | -0.08        | -0.16, 0.00         | 0.03         | -0.08, 0.13         | 0.02         | -0.07, 0.11         | 0.03         | -0.08, 0.14         | Omit         |                     |

Data are standardized  $\beta$ -coefficients (95% CI), N=3211. Models adjusted for center, age, sex, race, education, unemployment, health insurance, smoking, alcohol consumption, physical activity, fast food and sugar sweetened beverage consumption, depressive symptoms and body mass index. Bolded values are statistically significant ( $P < 0.05$ ).

Web Table 4: Single-Variable, Partition, and Isotemporal Substitution Models per 2-Hour/Day Increase in Six Sedentary Tasks and Fasting Glucose, the CARDIA Study (2010-2011)

| Analysis Method          | Television  |                   | Computer     |                     | Paperwork    |                     | Reading      |                     | Phone        |                     | Car          |                     |
|--------------------------|-------------|-------------------|--------------|---------------------|--------------|---------------------|--------------|---------------------|--------------|---------------------|--------------|---------------------|
|                          | $\beta$     | 95% CI            | $\beta$      | 95% CI              | $\beta$      | 95% CI              | $\beta$      | 95% CI              | $\beta$      | 95% CI              | $\beta$      | 95% CI              |
| Single <sup>b</sup>      | <b>0.10</b> | <b>0.05, 0.15</b> | -0.00        | -0.06, 0.05         | 0.00         | -0.08, 0.08         | 0.03         | -0.03, 0.09         | 0.05         | -0.02, 0.12         | 0.02         | -0.04, 0.08         |
| Partition <sup>c</sup>   | <b>0.10</b> | <b>0.05, 0.15</b> | -0.02        | -0.08, 0.04         | -0.02        | -0.11, 0.06         | 0.01         | -0.06, 0.08         | 0.03         | -0.05, 0.11         | 0.01         | -0.06, 0.07         |
| Isotemporal <sup>d</sup> |             |                   |              |                     |              |                     |              |                     |              |                     |              |                     |
| Replace Television       | Omit        |                   | <b>-0.12</b> | <b>-0.20, -0.04</b> | <b>-0.13</b> | <b>-0.23, -0.02</b> | <b>-0.09</b> | <b>-0.18, -0.00</b> | <b>-0.08</b> | <b>-0.18, -0.03</b> | <b>-0.09</b> | <b>-0.18, -0.01</b> |
| Replace Computer         | <b>0.12</b> | <b>0.04, 0.20</b> | Omit         |                     | -0.00        | -0.12, 0.11         | 0.03         | -0.06, 0.12         | 0.05         | -0.06, 0.15         | 0.03         | -0.06, 0.11         |
| Replace Paperwork        | <b>0.13</b> | <b>0.02, 0.23</b> | 0.00         | -0.11, 0.12         | Omit         |                     | 0.03         | -0.08, 0.15         | 0.05         | -0.08, 0.17         | 0.03         | -0.08, 0.14         |
| Replace Reading          | <b>0.09</b> | <b>0.00, 0.18</b> | -0.03        | -0.12, 0.06         | -0.03        | -0.15, 0.08         | Omit         |                     | 0.02         | -0.10, 0.13         | -0.00        | -0.10, 0.09         |
| Replace Phone            | <b>0.08</b> | <b>0.03, 0.18</b> | -0.05        | -0.15, 0.06         | -0.05        | -0.17, 0.08         | -0.02        | -0.13, 0.10         | Omit         |                     | -0.02        | -0.13, 0.09         |
| Replace Car              | <b>0.09</b> | <b>0.01, 0.18</b> | -0.03        | -0.11, 0.06         | -0.03        | -0.14, 0.08         | 0.00         | -0.09, 0.10         | 0.02         | -0.09, 0.13         | Omit         |                     |

Data are log transformed standardized  $\beta$ -coefficients (95% CI), N=3211. Models adjusted for center, age, sex, race, education, unemployment, health insurance, smoking, alcohol consumption, physical activity, fast food and sugar sweetened beverage consumption, depressive symptoms and body mass index. Bolded values are statistically significant ( $P < 0.05$ ).

Web Table 5: Single-Variable, Partition, and Isotemporal Substitution Models per 2-Hour/Day Increase in Six Sedentary Tasks and Fasting Insulin, the CARDIA Study (2010-2011)

| Analysis Method          | Television  |                   | Computer    |                   | Paperwork    |                     | Reading      |                     | Phone       |                   | Car          |                     |
|--------------------------|-------------|-------------------|-------------|-------------------|--------------|---------------------|--------------|---------------------|-------------|-------------------|--------------|---------------------|
|                          | $\beta$     | 95% CI            | $\beta$     | 95% CI            | $\beta$      | 95% CI              | $\beta$      | 95% CI              | $\beta$     | 95% CI            | $\beta$      | 95% CI              |
| Single <sup>b</sup>      | <b>0.13</b> | <b>0.09, 0.17</b> | <b>0.08</b> | <b>0.04, 0.13</b> | <b>0.08</b>  | <b>0.01, 0.14</b>   | <b>0.08</b>  | <b>0.02, 0.13</b>   | <b>0.10</b> | <b>0.05, 0.16</b> | 0.05         | -0.00, 0.10         |
| Partition <sup>c</sup>   | <b>0.11</b> | <b>0.07, 0.15</b> | <b>0.06</b> | <b>0.01, 0.10</b> | 0.01         | -0.06, 0.08         | 0.03         | -0.02, 0.09         | 0.04        | -0.03, 0.10       | 0.01         | -0.04, 0.06         |
| Isotemporal <sup>d</sup> |             |                   |             |                   |              |                     |              |                     |             |                   |              |                     |
| Replace Television       | Omit        |                   | -0.05       | -0.12, 0.01       | <b>-0.10</b> | <b>-0.18, -0.02</b> | <b>-0.08</b> | <b>-0.15, -0.00</b> | -0.07       | -0.15, 0.01       | <b>-0.10</b> | <b>-0.17, -0.03</b> |
| Replace Computer         | 0.05        | -0.01, 0.12       | Omit        |                   | -0.05        | -0.14, 0.05         | -0.02        | -0.09, 0.05         | -0.02       | -0.10, 0.07       | -0.05        | -0.12, 0.02         |
| Replace Paperwork        | <b>0.10</b> | <b>0.02, 0.18</b> | 0.05        | -0.05, 0.14       | Omit         |                     | 0.03         | -0.07, 0.12         | 0.03        | -0.07, 0.13       | 0.00         | -0.09, 0.09         |
| Replace Reading          | <b>0.08</b> | <b>0.00, 0.15</b> | 0.02        | -0.05, 0.09       | -0.03        | -0.12, 0.07         | Omit         |                     | 0.00        | -0.09, 0.10       | -0.03        | -0.10, 0.05         |
| Replace Phone            | 0.07        | -0.01, 0.15       | 0.02        | -0.07, 0.10       | -0.03        | -0.13, 0.07         | -0.00        | -0.10, 0.09         | Omit        |                   | -0.03        | -0.12, 0.06         |
| Replace Car              | <b>0.10</b> | <b>0.03, 0.17</b> | 0.05        | -0.02, 0.12       | -0.00        | -0.09, 0.09         | 0.03         | -0.05, 0.10         | 0.03        | -0.06, 0.12       | Omit         |                     |

Data are log transformed standardized  $\beta$ -coefficients (95% CI), N=3211. Models adjusted for center, age, sex, race, education, unemployment, health insurance, smoking, alcohol consumption, physical activity, fast food and sugar sweetened beverage consumption, depressive symptoms and body mass index. Bolded values are statistically significant ( $P < 0.05$ ).

Web Table 6: Single-Variable, Partition, and Isotemporal Substitution Models per 2-Hour/Day Increase in Six Sedentary Tasks and Triglycerides, the CARDIA Study (2010-2011)

| Analysis Method          | Television  |                   | Computer     |                     | Paperwork    |                     | Reading      |                     | Phone        |                     | Car          |                     |
|--------------------------|-------------|-------------------|--------------|---------------------|--------------|---------------------|--------------|---------------------|--------------|---------------------|--------------|---------------------|
|                          | $\beta$     | 95% CI            | $\beta$      | 95% CI              | $\beta$      | 95% CI              | $\beta$      | 95% CI              | $\beta$      | 95% CI              | $\beta$      | 95% CI              |
| Single <sup>b</sup>      | <b>0.15</b> | <b>0.10, 0.20</b> | 0.04         | -0.01, 0.10         | 0.04         | -0.04, 0.12         | 0.05         | -0.02, 0.11         | 0.04         | -0.03, 0.11         | -0.02        | -0.08, 0.04         |
| Partition <sup>c</sup>   | <b>0.15</b> | <b>0.10, 0.20</b> | 0.02         | -0.03, 0.08         | 0.01         | -0.08, 0.10         | 0.03         | -0.04, 0.09         | -0.00        | -0.09, 0.08         | -0.05        | -0.11, 0.01         |
| Isotemporal <sup>d</sup> |             |                   |              |                     |              |                     |              |                     |              |                     |              |                     |
| Replace Television       | Omit        |                   | <b>-0.12</b> | <b>-0.20, -0.04</b> | <b>-0.14</b> | <b>-0.24, -0.04</b> | <b>-0.12</b> | <b>-0.21, -0.03</b> | <b>-0.15</b> | <b>-0.26, -0.05</b> | <b>-0.20</b> | <b>-0.28, -0.11</b> |
| Replace Computer         | <b>0.12</b> | <b>0.04, 0.20</b> | Omit         |                     | -0.02        | -0.13, 0.10         | 0.00         | -0.09, 0.09         | -0.03        | -0.13, 0.08         | -0.07        | -0.16, 0.01         |
| Replace Paperwork        | <b>0.14</b> | <b>0.04, 0.24</b> | 0.02         | -0.10, 0.13         | Omit         |                     | 0.02         | -0.10, 0.14         | -0.02        | -0.14, 0.11         | -0.06        | -0.17, 0.05         |
| Replace Reading          | <b>0.12</b> | <b>0.03, 0.21</b> | -0.00        | -0.09, 0.09         | -0.02        | 0.14, 0.10          | Omit         |                     | -0.03        | -0.15, 0.09         | -0.08        | -0.17, 0.02         |
| Replace Phone            | <b>0.15</b> | <b>0.05, 0.26</b> | 0.03         | -0.08, 0.13         | 0.02         | -0.11, 0.14         | 0.03         | -0.09, 0.15         | Omit         |                     | -0.05        | -0.16, 0.07         |
| Replace Car              | <b>0.20</b> | <b>0.11, 0.28</b> | 0.07         | -0.01, 0.16         | 0.06         | -0.05, 0.17         | 0.08         | -0.02, 0.17         | 0.05         | -0.07, 0.16         | Omit         |                     |

Data are log transformed standardized  $\beta$ -coefficients (95% CI), N=3211. Models adjusted for center, age, sex, race, education, unemployment, health insurance, smoking, alcohol consumption, physical activity, fast food and sugar sweetened beverage consumption, depressive symptoms and body mass index. Bolded values are statistically significant ( $P < 0.05$ ).

Web Table 7: Single-Variable, Partition, and Isotemporal Substitution Models per 2-Hour/Day Increase in Six Sedentary Tasks and Negative HDL-Cholesterol, the CARDIA Study (2010-2011)

| Analysis Method          | Television  |                   | Computer    |                   | Paperwork   |                   | Reading |             | Phone   |             | Car          |                     |
|--------------------------|-------------|-------------------|-------------|-------------------|-------------|-------------------|---------|-------------|---------|-------------|--------------|---------------------|
|                          | $\beta$     | 95% CI            | $\beta$     | 95% CI            | $\beta$     | 95% CI            | $\beta$ | 95% CI      | $\beta$ | 95% CI      | $\beta$      | 95% CI              |
| Single <sup>b</sup>      | <b>0.05</b> | <b>0.01, 0.10</b> | <b>0.08</b> | <b>0.03, 0.12</b> | <b>0.09</b> | <b>0.03, 0.16</b> | 0.04    | -0.02, 0.09 | 0.03    | -0.03, 0.09 | 0.01         | -0.04, 0.06         |
| Partition <sup>c</sup>   | 0.04        | -0.00, 0.09       | <b>0.06</b> | <b>0.01, 0.11</b> | 0.06        | -0.02, 0.13       | 0.02    | -0.04, 0.08 | -0.02   | -0.09, 0.06 | -0.01        | -0.07, 0.04         |
| Isotemporal <sup>d</sup> |             |                   |             |                   |             |                   |         |             |         |             |              |                     |
| Replace Television       | Omit        |                   | 0.02        | -0.05, 0.09       | 0.01        | -0.07, 0.10       | -0.02   | -0.10, 0.05 | -0.06   | -0.14, 0.03 | -0.06        | -0.13, 0.01         |
| Replace Computer         | -0.02       | -0.09, 0.05       | Omit        |                   | -0.01       | -0.11, 0.09       | -0.05   | -0.12, 0.03 | -0.08   | -0.17, 0.01 | <b>-0.08</b> | <b>-0.15, -0.00</b> |
| Replace Paperwork        | -0.01       | -0.10, 0.07       | 0.01        | -0.09, 0.11       | Omit        |                   | -0.04   | -0.14, 0.06 | -0.07   | -0.18, 0.04 | -0.07        | -0.17, 0.02         |
| Replace Reading          | 0.02        | -0.05, 0.10       | 0.05        | -0.03, 0.12       | 0.04        | -0.06, 0.14       | Omit    |             | -0.03   | -0.13, 0.07 | -0.03        | -0.12, 0.05         |
| Replace Phone            | 0.06        | -0.03, 0.14       | 0.08        | -0.01, 0.17       | 0.07        | -0.04, 0.18       | 0.03    | -0.07, 0.13 | Omit    |             | 0.00         | -0.10, 0.10         |
| Replace Car              | 0.06        | -0.01, 0.13       | <b>0.08</b> | <b>0.00, 0.15</b> | 0.07        | -0.02, 0.17       | 0.03    | -0.05, 0.12 | -0.00   | -0.10, 0.10 | Omit         |                     |

Data are log transformed standardized  $\beta$ -coefficients (95% CI), N=3211. Models adjusted for center, age, sex, race, education, unemployment, health insurance, smoking, alcohol consumption, physical activity, fast food and sugar sweetened beverage consumption, depressive symptoms and body mass index. Bolded values are statistically significant ( $P < 0.05$ ).
